# Supplementary material for: Development of a High-Performance Fluorescent Probe for Food Safety: N,Si-CDs for Detecting Tetracycline and Chloramphenicol
Source: Research Square preprint supplement (doi:10.21203/rs.3.rs-8118777/v1), 2025-11-27
Supplement: Supplementary file 1 [file f2403d77d229fcc4580410e4.docx]

**Development of a High-Performance Fluorescent Probe for Food Safety: N,Si-CDs for Detecting Tetracycline and Chloramphenicol**

Dilong Hong, Fanshu Zhao, Yuliang Jiang

School of Chemistry and Materials Science, Nanjing Normal University, Nanjing 210023, China

**List of contents**

1. Experimental medicine and instruments

2. Fourier infrared spectrum of N,Si-CDs

3. XRD of N,Si-CDs

4. Fluorescence emission spectra at different excitation wavelengths (250-340 nm) of N,Si-CDs

5. Fluorescence intensity changes of CAP and TC in N,Si-CDs solution within one hour

6. Fluorescence intensity change of N,Si-CDs solution under 365 nm ultraviolet lamp irradiation for 1 hour

7. Fluorescence changes of N,Si-CDs solution after 30 days of storage

8. TGA of N,Si-CDs

9. UV absorption spectra of N,Si-CDs with and without CAP and TC, as well as UV absorption spectra of TC

10. Zeta potential of N,Si-CDs with and without TC and CAP

11. UV absorption spectra of CAP and excitation/emission spectra of N,Si-CDs

12. Compare this work with the previously reported CAP/TC determination method

13. Average fluorescence lifetime of N,Si-CDs, N,Si-CDs + TC, N,Si-CDs + CAP

14. Detection of TC in actual sample

1. Experimental medicine and instruments

Ca2+、Cd2+、K+、Zn2+、Al3+、Co2+used in the experiments were purchased from Sinopharm Chemical Reagent Co., Ltd. L-Histidine, L-Methionine, L-Leucine, L-Lysine, and L-Threonine were purchased from Huixing Biochemical Reagent Co., Ltd., China. Ni2+、Mn2+、Hg2+、Mg2+, and D-2-Phenylglycine were purchased from Aladdin. Neomycin, Florfenicol, and Amoxicillin were purchased from Adamas-beta. Chloramphenicol, Tetracycline, Erythromycin, and Streptomycin Sulfate were purchased from Macklin. Curcumin was purchased from Xiya Reagent, and Hcy (DL-Homocysteine) was purchased from TCI.

The high-resolution transmission electron microscope (HRTEM) used was JEM-2100F (JEOL, Japan), the X-ray photoelectron spectrometer was ESCALAB Xi (Thermo Fisher Scientific, USA), the UV-Vis spectrophotometer was Lambda 1050+ (PerkinElmer, USA), the fluorescence spectrophotometer was F-7100 (Hitachi, Japan), the infrared spectrometer was ALPHAⅡ (Bruker, Germany), the transient/steady-state fluorescence spectrometer was FM-4P-TCSPC (HORIBA, USA), the Zeta potential analyzer was Malvern Zetasizer Nano ZS90 (Malvern, UK), the pH meter was PHS-3C (Shanghai Nuoke Instrument Co., Ltd.), the electronic balance was ME204 (Mettler Toledo, Switzerland), and the forced-draft drying oven was DHG-9023A (Shanghai Jinghong Experimental Equipment Co., Ltd.).

2. Fourier infrared spectrum of N,Si-CDs





Fig. S1. Fourier infrared spectrum of N,Si-CDs.

3. XRD of N,Si-CDs





Fig. S2. XRD of N,Si-CDs.

4. Fluorescence emission spectra at different excitation wavelengths(250-340nm) of N,Si-CDs





Fig. S3. Fluorescence emission spectra at different excitation wavelengths(250-340nm) of N,Si-CDs.

5. Fluorescence intensity changes of CAP and TC in N,Si-CDs solution within one hour





Fig. S4. (a) with and without CAP Changes in Fluorescence Intensity of N,Si-CDs Solution within one hour. (b) with and without TC Changes in Fluorescence Intensity of N,Si-CDs Solution within one hour.

6. Fluorescence intensity change of N,Si-CDs solution under 365 nm ultraviolet lamp irradiation for 1 hour





Fig. S5. Fluorescence intensity change of N,Si-CDs solution under 365 nm ultraviolet lamp

irradiation for 1 hour.

7. N,Si-CDs solution fluorescence changes over 30 days of storage.





Fig. S6. N,Si-CDs solution fluorescence changes over 30 days of storage.

8. TGA of N,Si-CDs





Fig. S7. TGA of N,Si-CDs.

9. UV absorption spectra of N,Si-CDs with and without CAP and TC







Fig. S8.(a) UV absorption spectra of TC, N,Si-CDs, and N,Si-CDs + TC. (b) UV absorption spectra of N,Si-CDs with and without CAP.

10. Zeta potential of N,Si-CDs with and without TC and CAP





Fig. S9. Zeta potential of N,Si-CDs with and without TC and CAP.

11. UV absorption spectra of CAP and excitation/emission spectra of N,Si-CDs





Fig. S10. UV absorption spectra of CAP and excitation/emission spectra of N,Si-CDs.

12. Table S1. Compare this work with the previously reported CAP/TC determination method

| Sensor | Detection | Linear range | references |
| --- | --- | --- | --- |
| Electrochemical antibiotic sensors | 0.55μM | 2.0-100/100-1000 μM | [1] |
| QCM | 11 μM | 0.1-0.5mM | [2] |
| 3DCNTS@CuNPS@MIP | 10 μM | 0.01-0.5mM | [3] |
| Electrochemical sensor | 6.08 μM | 10-550 μM | [4] |
| PGE | 0.57 μM | 1-200 μM | [5] |
| N,Si-CDs | 0.54 μM | 10-40 μM | This work(CAP) |

| Sensor | Detection | Linear range | references |
| --- | --- | --- | --- |
| Mxenes | 0.676 μM | 0.769-46.15 μM | [6] |
| S,N-CDs | 0.56 μM | 1.88-60 μM | [7] |
| Eu3+/NH2-MIL-53(AL) | 0.92mM | 1.5-70 mM | [8] |
| Al-CDs | 15.54 μM | 0-100 μM | [9] |
| Cu-MOF | 1.007 μM | 0.0001-100 μM | [10] |
| N,Si-CDs | 0.45 μM | 10-30 μM | This work(TC) |

13. Table S2. Average fluorescence lifetime of N,Si-CDs, N,Si-CDs + TC, N,Si-CDs + CAP

| Sample | τ1/ns | B1 | τ2/ns | B2 | τ3/ns | B3 | τavg/ns | Model |  |
| --- | --- | --- | --- | --- | --- | --- | --- | --- | --- |
| N,Si-CDs | 8.86 | 0.38 | 1.94 | 0.47 | 20.45 | 0.15 | 7.35 | Triple |  |
| N,Si-CDs+TC | 8.75 | 0.39 | 2.02 | 0.46 | 20.35 | 0.15 | 7.39 | Triple |  |
| N,Si-CDs+CAP | 9.20 | 0.39 | 2.15 | 0.47 | 20.73 | 0.14 | 7.50 | Triple |  |

14. Table S3.Detection of TC in actual samples

| Sample | Added  (μmol/L) | Founded  (μmol/L) | RSD  (%),n=3 | Recovery  (%) |
| --- | --- | --- | --- | --- |
| Honey | 0 | 0 | / | / |
|  | 12.5 | 13.18 | 1.18 | 105.4 |
|  | 15 | 16.05 | 0.81 | 107 |
|  | 17.5 | 18.07 | 0.36 | 103.3 |
| Yili milk | 0 | 0 | / | / |
|  | 12.5 | 13.16 | 0.61 | 105.4 |
|  | 15 | 16.36 | 0.32 | 109.1 |
|  | 17.5 | 17.54 | 0.31 | 100.2 |
| WatersolubleC | 0 | 0 | / | / |
|  | 12.5 | 12.66 | 0.75 | 101.3 |
|  | 15 | 16.13 | 0.04 | 107.5 |
|  | 17.5 | 17.91 | 0.37 | 102.3 |
| Plum juice | 0 | 0 | / | / |
|  | 12.5 | 13.35 | 0.92 | 106.8 |
|  | 15 | 14.29 | 0.19 | 95.3 |
|  | 17.5 | 18.93 | 0.56 | 108.2 |
| Lemon tea | 0 | 0 | / | / |
|  | 12.5 | 13.98 | 0.44 | 118.4 |
|  | 15 | 14.41 | 0.43 | 96.1 |
|  | 17.5 | 18.06 | 0.17 | 103.2 |

**Reference**

[1] S. Karakaya, İ. Kaya, F. Kolcu, Y. Dilgin, Application of a novel anthracene derivative polymer for sensitive voltammetric determination of chloramphenicol in pharmaceutical and food samples, European Polymer Journal, 229 (2025) 113863.

[2] A. Shaheen, F. Idrees, F.K. Butt, A. Mujahid, A. Afzal, S. Ullah, T. Asim, W.S. Khan, S.Z. Bajwa, Synthesis and integration of sea urchin-like MnO2-GCN nanocomposite with imprinted polymers for mass-sensitive detection of chloramphenicol in water, Composites Communications, 56 (2025) 102357.

[3] A. Munawar, M.A. Tahir, A. Shaheen, P.A. Lieberzeit, W.S. Khan, S.Z. Bajwa, Investigating nanohybrid material based on 3D CNTs@Cu nanoparticle composite and imprinted polymer for highly selective detection of chloramphenicol, Journal of Hazardous Materials, 342 (2018) 96-106.

[4] G. Sakaleshpur Kumar, S. Ballur Prasanna, B. Lokesh Marenahalli, S. Shadakshari, S. Arehalli Shivamurthy, J.R. Rajabathar, K. Chimatahalli Shanthakumar, Y.-K. Han, Flake-like structure of SrTiO3 nanoparticles dispersed on graphene oxide: A selective and sensitive electrochemical sensor for determination of chloramphenicol in milk and honey samples, Food Chemistry, 444 (2024) 138637.

[5] W. Chang, Y. Zhu, Y. Ma, Z. Zheng, C. Wang, Silk Derived Fe/N-Doping Porous Carbon Nanosheets for Chloramphenicol Electrochemical Detection, Current Analytical Chemistry, 18 (2022) 1017-1028.

[6] W. Wang, Y. Yin, S. Gunasekaran, Nanozymatic degradation and simultaneous colorimetric detection of tetracycline, Food Chemistry, 426 (2023) 136607.

[7] Y. Fan, W. Qiao, W. Long, H. Chen, H. Fu, C. Zhou, Y. She, Detection of tetracycline antibiotics using fluorescent “Turn-off” sensor based on S, N-doped carbon quantum dots, Spectrochimica Acta Part A: Molecular and Biomolecular Spectroscopy, 274 (2022) 121033.

[8] J. Chen, Y. Xu, S. Li, F. Xu, Q. Zhang, Ratio fluorescence detection of tetracycline by a Eu3+/NH2-MIL-53(Al) composite, RSC Advances, 11 (2021) 2397-2404.

[9] C. Yu, Q. Sun, Z. Wang, M. Sun, X. Xu, W. Li, Aluminium-doped Carbon Dots for the Simultaneous Selective Detection of Five Tetracycline Antibiotics, Journal of Fluorescence, 35 (2024) 3071-3081.

[10] L. Sankhla, A. Kumar, H.S. Kushwah, Electrochemical detection of tetracycline using Cu-MOF functionalised screen-printed electrodes, Scientific Reports, 15 (2025) 19129.
